# Supplementary material for: Contribution of prosthetic treatment considerations for dental extractions of permanent teeth
Source: PeerJ. 2016 Jul 7;4:e2015. doi: 10.7717/peerj.2015 (PMC4941750; doi:10.7717/peerj.2015)
Supplement: Data S1 [file peerj-04-2015-s001.xlsx]

## Sheet: Hoja1
id	age	sex	num_ext	Arch	sextant	Tooth_type	Reason_prost
1	34	Men	1	Upper	anterior	incisors	others
2	53	Men	1	Upper	anterior	incisors	others
3	22	Women	1	Upper	anterior	incisors	others
4	31	Women	1	Upper	anterior	incisors	others
5	39	Men	1	Upper	anterior	incisors	others
6	34	Women	2	Upper	anterior	incisors	others
7	58	Men	2	Upper	anterior	incisors	others
8	53	Women	2	Upper	anterior	incisors	others
9	45	Men	2	Upper	anterior	incisors	others
10	49	Women	2	Upper	anterior	incisors	prosthetic reason
11	53	Women	3	Upper	anterior	incisors	others
12	34	Women	3	Upper	anterior	incisors	others
13	60	Women	4	Upper	anterior	incisors	others
14	26	Women	4	Upper	anterior	incisors	others
15	41	Men	4	Upper	anterior	incisors	others
16	55	Men	6	Upper	anterior	incisors	prosthetic reason
17	57	Women	9	Upper	anterior	incisors	others
18	63	Women	14	Upper	anterior	incisors	others
19	25	Women	2	Upper	anterior	incisors	others
20	60	Women	2	Upper	anterior	incisors	others
21	46	Women	3	Upper	anterior	incisors	others
22	72	Women	9	Upper	anterior	incisors	prosthetic reason
23	52	Women	3	Upper	anterior	incisors	others
24	50	Women	3	Upper	anterior	incisors	others
25	55	Women	4	Upper	anterior	incisors	others
26	28	Men	4	Upper	anterior	incisors	others
27	51	Men	5	Upper	anterior	incisors	others
28	74	Men	6	Upper	anterior	incisors	others
29	49	Women	7	Upper	anterior	incisors	prosthetic reason
30	33	Men	7	Upper	anterior	incisors	others
31	56	Men	16	Upper	anterior	incisors	others
32	51	Women	1	Upper	anterior	incisors	others
33	32	Women	1	Upper	anterior	incisors	prosthetic reason
34	48	Women	2	Upper	anterior	incisors	others
35	65	Women	5	Upper	anterior	incisors	others
36	48	Women	5	Upper	anterior	incisors	others
37	43	Women	5	Upper	anterior	incisors	others
38	49	Women	7	Upper	anterior	incisors	prosthetic reason
39	34	Women	2	Upper	anterior	incisors	others
40	59	Women	2	Upper	anterior	incisors	others
41	26	Women	4	Upper	anterior	incisors	others
42	41	Men	4	Upper	anterior	incisors	others
43	55	Men	6	Upper	anterior	incisors	prosthetic reason
44	74	Men	6	Upper	anterior	incisors	others
45	50	Men	3	Upper	anterior	incisors	others
46	51	Women	3	Upper	anterior	incisors	prosthetic reason
47	37	Men	9	Upper	anterior	incisors	others
48	36	Women	4	Upper	anterior	incisors	prosthetic reason
49	51	Men	5	Upper	anterior	incisors	others
50	50	Women	9	Upper	anterior	incisors	others
51	65	Women	9	Upper	anterior	incisors	others
52	47	Men	1	Upper	anterior	canines	others
53	59	Women	2	Upper	anterior	canines	others
54	45	Women	2	Upper	anterior	canines	others
55	50	Men	3	Upper	anterior	canines	prosthetic reason
56	36	Men	3	Upper	anterior	canines	prosthetic reason
57	42	Men	3	Upper	anterior	canines	others
58	51	Men	5	Upper	anterior	canines	others
59	43	Women	5	Upper	anterior	canines	prosthetic reason
60	74	Men	6	Upper	anterior	canines	others
61	50	Women	9	Upper	anterior	canines	others
62	67	Men	2	Upper	anterior	canines	others
63	43	Men	3	Upper	anterior	canines	others
64	41	Men	4	Upper	anterior	canines	others
65	43	Women	5	Upper	anterior	canines	others
66	49	Women	7	Upper	anterior	canines	prosthetic reason
67	63	Women	14	Upper	anterior	canines	others
68	55	Men	6	Upper	anterior	canines	prosthetic reason
69	71	Women	4	Upper	anterior	canines	others
70	37	Men	9	Upper	anterior	canines	others
71	40	Women	5	Upper	anterior	canines	others
72	51	Men	5	Upper	anterior	canines	others
73	65	Women	5	Upper	anterior	canines	others
74	75	Men	8	Upper	anterior	canines	others
75	65	Men	14	Upper	anterior	canines	prosthetic reason
76	65	Women	9	Upper	anterior	canines	others
77	56	Men	16	Upper	anterior	canines	others
78	46	Women	1	Upper	posterior	premolars	others
79	79	Men	1	Upper	posterior	premolars	others
80	22	Women	2	Upper	posterior	premolars	others
81	30	Women	2	Upper	posterior	premolars	others
82	46	Women	3	Upper	posterior	premolars	prosthetic reason
83	43	Women	3	Upper	posterior	premolars	others
84	80	Women	4	Upper	posterior	premolars	prosthetic reason
85	49	Women	5	Upper	posterior	premolars	others
86	52	Men	6	Upper	posterior	premolars	others
87	41	Women	8	Upper	posterior	premolars	others
88	36	Men	2	Upper	posterior	premolars	others
89	50	Men	3	Upper	posterior	premolars	prosthetic reason
90	36	Men	3	Upper	posterior	premolars	prosthetic reason
91	53	Women	3	Upper	posterior	premolars	others
92	65	Women	5	Upper	posterior	premolars	others
93	43	Men	3	Upper	posterior	premolars	others
94	32	Women	3	Upper	posterior	premolars	others
95	59	Women	8	Upper	posterior	premolars	others
96	56	Men	16	Upper	posterior	premolars	others
97	49	Women	8	Upper	posterior	premolars	others
98	65	Men	14	Upper	posterior	premolars	prosthetic reason
99	34	Women	1	Upper	posterior	premolars	others
100	35	Women	1	Upper	posterior	premolars	others
101	37	Women	1	Upper	posterior	premolars	others
102	42	Women	1	Upper	posterior	premolars	others
103	46	Men	1	Upper	posterior	premolars	others
104	50	Men	1	Upper	posterior	premolars	others
105	52	Men	1	Upper	posterior	premolars	others
106	44	Women	1	Upper	posterior	premolars	prosthetic reason
107	40	Women	2	Upper	posterior	premolars	others
108	23	Women	2	Upper	posterior	premolars	others
109	52	Men	4	Upper	posterior	premolars	others
110	44	Women	4	Upper	posterior	premolars	others
111	44	Men	4	Upper	posterior	premolars	others
112	36	Women	4	Upper	posterior	premolars	others
113	48	Women	2	Upper	posterior	premolars	others
114	33	Men	2	Upper	posterior	premolars	others
115	49	Men	3	Upper	posterior	premolars	others
116	44	Women	4	Upper	posterior	premolars	others
117	41	Women	8	Upper	posterior	premolars	others
118	50	Men	3	Upper	posterior	premolars	others
119	65	Women	5	Upper	posterior	premolars	others
120	63	Women	14	Upper	posterior	premolars	others
121	49	Women	5	Upper	posterior	premolars	others
122	56	Men	16	Upper	posterior	premolars	others
123	75	Men	8	Upper	posterior	premolars	others
124	65	Men	14	Upper	posterior	premolars	prosthetic reason
125	19	Men	1	Upper	posterior	molars	others
126	40	Women	1	Upper	posterior	molars	others
127	42	Women	1	Upper	posterior	molars	others
128	49	Men	1	Upper	posterior	molars	others
129	50	Women	1	Upper	posterior	molars	others
130	51	Women	1	Upper	posterior	molars	others
131	45	Men	1	Upper	posterior	molars	others
132	22	Men	2	Upper	posterior	molars	others
133	23	Men	2	Upper	posterior	molars	others
134	64	Men	3	Upper	posterior	molars	others
135	49	Men	4	Upper	posterior	molars	others
136	65	Men	14	Upper	posterior	molars	others
137	30	Men	2	Upper	posterior	molars	others
138	33	Women	2	Upper	posterior	molars	others
139	60	Women	4	Upper	posterior	molars	others
140	52	Men	4	Upper	posterior	molars	others
141	36	Women	4	Upper	posterior	molars	others
142	43	Women	5	Upper	posterior	molars	prosthetic reason
143	63	Women	14	Upper	posterior	molars	prosthetic reason
144	56	Men	16	Upper	posterior	molars	others
145	49	Women	7	Upper	posterior	molars	prosthetic reason
146	47	Women	1	Upper	posterior	molars	others
147	48	Women	1	Upper	posterior	molars	others
148	60	Women	1	Upper	posterior	molars	others
149	51	Women	1	Upper	posterior	molars	prosthetic reason
150	49	Women	2	Upper	posterior	molars	others
151	50	Women	3	Upper	posterior	molars	others
152	54	Women	4	Upper	posterior	molars	prosthetic reason
153	42	Women	9	Upper	posterior	molars	others
154	49	Women	2	Upper	posterior	molars	others
155	43	Women	3	Upper	posterior	molars	others
156	49	Men	4	Upper	posterior	molars	others
157	47	Women	4	Upper	posterior	molars	others
158	46	Women	5	Upper	posterior	molars	others
159	43	Women	5	Upper	posterior	molars	prosthetic reason
160	56	Men	16	Upper	posterior	molars	others
161	42	Women	4	Upper	posterior	molars	others
162	41	Men	4	Upper	posterior	molars	others
163	50	Women	9	Upper	posterior	molars	others
164	37	Men	9	Upper	posterior	molars	others
165	33	Men	7	Upper	posterior	molars	others
166	57	Women	9	Upper	posterior	molars	prosthetic reason
167	33	Men	1	Upper	posterior	molars	others
168	43	Women	1	Upper	posterior	molars	others
169	54	Women	1	Upper	posterior	molars	others
170	20	Men	1	Upper	posterior	molars	others
171	20	Men	1	Upper	posterior	molars	others
172	22	Women	1	Upper	posterior	molars	others
173	24	Women	1	Upper	posterior	molars	others
174	37	Men	1	Upper	posterior	molars	prosthetic reason
175	43	Women	1	Upper	posterior	molars	prosthetic reason
176	44	Women	1	Upper	posterior	molars	prosthetic reason
177	46	Men	1	Upper	posterior	molars	prosthetic reason
178	47	Women	1	Upper	posterior	molars	prosthetic reason
179	57	Women	1	Upper	posterior	molars	prosthetic reason
180	58	Women	1	Upper	posterior	molars	prosthetic reason
181	22	Women	1	Upper	posterior	molars	others
182	22	Men	1	Upper	posterior	molars	others
183	41	Women	1	Upper	posterior	molars	others
184	33	Men	2	Upper	posterior	molars	others
185	19	Men	2	Upper	posterior	molars	others
186	22	Men	2	Upper	posterior	molars	others
187	20	Women	2	Upper	posterior	molars	others
188	32	Men	2	Upper	posterior	molars	others
189	45	Women	2	Upper	posterior	molars	prosthetic reason
190	60	Women	2	Upper	posterior	molars	prosthetic reason
191	36	Women	2	Upper	posterior	molars	others
192	21	Women	2	Upper	posterior	molars	others
193	59	Women	3	Upper	posterior	molars	prosthetic reason
194	47	Women	4	Upper	posterior	molars	others
195	53	Men	5	Upper	posterior	molars	others
196	20	Women	2	Upper	posterior	molars	others
197	29	Women	2	Upper	posterior	molars	others
198	39	Women	2	Upper	posterior	molars	prosthetic reason
199	42	Women	9	Upper	posterior	molars	others
200	55	Women	3	Upper	posterior	molars	prosthetic reason
201	34	Men	3	Upper	posterior	molars	prosthetic reason
202	64	Men	3	Upper	posterior	molars	others
203	34	Women	3	Upper	posterior	molars	others
204	44	Men	4	Upper	posterior	molars	others
205	49	Women	5	Upper	posterior	molars	prosthetic reason
206	41	Women	8	Upper	posterior	molars	others
207	26	Women	4	Upper	posterior	molars	others
208	28	Men	4	Upper	posterior	molars	others
209	44	Women	4	Upper	posterior	molars	prosthetic reason
210	52	Men	6	Upper	posterior	molars	others
211	61	Men	1	Upper	anterior	incisors	others
212	55	Men	1	Upper	anterior	incisors	others
213	36	Women	1	Upper	anterior	incisors	others
214	40	Women	1	Upper	anterior	incisors	others
215	25	Women	2	Upper	anterior	incisors	others
216	60	Women	2	Upper	anterior	incisors	others
217	50	Women	2	Upper	anterior	incisors	others
218	65	Women	2	Upper	anterior	incisors	prosthetic reason
219	59	Women	3	Upper	anterior	incisors	others
220	49	Men	3	Upper	anterior	incisors	others
221	40	Women	5	Upper	anterior	incisors	others
222	45	Men	2	Upper	anterior	incisors	others
223	53	Women	2	Upper	anterior	incisors	others
224	60	Women	4	Upper	anterior	incisors	others
225	42	Women	4	Upper	anterior	incisors	others
226	41	Men	4	Upper	anterior	incisors	others
227	36	Women	4	Upper	anterior	incisors	others
228	72	Women	9	Upper	anterior	incisors	prosthetic reason
229	55	Men	6	Upper	anterior	incisors	prosthetic reason
230	49	Women	7	Upper	anterior	incisors	prosthetic reason
231	54	Women	1	Upper	anterior	incisors	others
232	62	Women	1	Upper	anterior	incisors	others
233	71	Men	1	Upper	anterior	incisors	others
234	43	Women	1	Upper	anterior	incisors	others
235	53	Women	2	Upper	anterior	incisors	others
236	65	Women	2	Upper	anterior	incisors	others
237	52	Women	3	Upper	anterior	incisors	others
238	50	Men	3	Upper	anterior	incisors	others
239	55	Women	4	Upper	anterior	incisors	others
240	71	Women	4	Upper	anterior	incisors	others
241	65	Women	9	Upper	anterior	incisors	others
242	50	Women	2	Upper	anterior	incisors	others
243	59	Women	3	Upper	anterior	incisors	others
244	40	Women	5	Upper	anterior	incisors	others
245	52	Men	6	Upper	anterior	incisors	others
246	46	Women	3	Upper	anterior	incisors	others
247	26	Women	4	Upper	anterior	incisors	others
248	43	Women	5	Upper	anterior	incisors	others
249	50	Women	9	Upper	anterior	incisors	others
250	60	Women	4	Upper	anterior	incisors	others
251	41	Men	4	Upper	anterior	incisors	others
252	74	Men	6	Upper	anterior	incisors	others
253	57	Women	9	Upper	anterior	incisors	others
254	59	Women	8	Upper	anterior	incisors	others
255	56	Men	16	Upper	anterior	incisors	others
256	35	Women	1	Upper	anterior	canines	others
257	55	Women	1	Upper	anterior	canines	others
258	66	Men	1	Upper	anterior	canines	others
259	70	Men	1	Upper	anterior	canines	others
260	57	Women	1	Upper	anterior	canines	others
261	67	Men	2	Upper	anterior	canines	others
262	55	Women	2	Upper	anterior	canines	prosthetic reason
263	49	Men	4	Upper	anterior	canines	others
264	59	Women	8	Upper	anterior	canines	prosthetic reason
265	37	Men	9	Upper	anterior	canines	others
266	52	Women	3	Upper	anterior	canines	others
267	50	Men	3	Upper	anterior	canines	others
268	43	Women	3	Upper	anterior	canines	others
269	50	Women	9	Upper	anterior	canines	others
270	65	Women	9	Upper	anterior	canines	others
271	36	Men	3	Upper	anterior	canines	others
272	71	Women	4	Upper	anterior	canines	others
273	65	Women	5	Upper	anterior	canines	others
274	43	Women	5	Upper	anterior	canines	others
275	72	Women	9	Upper	anterior	canines	prosthetic reason
276	55	Men	6	Upper	anterior	canines	others
277	74	Men	6	Upper	anterior	canines	others
278	75	Men	8	Upper	anterior	canines	others
279	56	Men	16	Upper	anterior	canines	others
280	57	Women	9	Upper	anterior	canines	others
281	46	Women	1	Upper	posterior	premolars	others
282	52	Women	1	Upper	posterior	premolars	others
283	52	Men	1	Upper	posterior	premolars	others
284	57	Women	1	Upper	posterior	premolars	others
285	73	Women	1	Upper	posterior	premolars	prosthetic reason
286	36	Men	2	Upper	posterior	premolars	others
287	52	Men	2	Upper	posterior	premolars	others
288	54	Women	4	Upper	posterior	premolars	prosthetic reason
289	58	Men	2	Upper	posterior	premolars	others
290	22	Women	2	Upper	posterior	premolars	others
291	30	Women	2	Upper	posterior	premolars	others
292	49	Women	2	Upper	posterior	premolars	prosthetic reason
293	42	Men	3	Upper	posterior	premolars	others
294	55	Women	4	Upper	posterior	premolars	others
295	71	Women	4	Upper	posterior	premolars	others
296	37	Men	9	Upper	posterior	premolars	others
297	65	Women	9	Upper	posterior	premolars	others
298	41	Women	8	Upper	posterior	premolars	others
299	46	Women	5	Upper	posterior	premolars	prosthetic reason
300	55	Men	6	Upper	posterior	premolars	others
301	22	Women	1	Upper	posterior	premolars	others
302	29	Women	1	Upper	posterior	premolars	others
303	38	Women	1	Upper	posterior	premolars	others
304	45	Men	1	Upper	posterior	premolars	others
305	51	Women	1	Upper	posterior	premolars	others
306	65	Men	1	Upper	posterior	premolars	others
307	44	Men	2	Upper	posterior	premolars	others
308	66	Women	2	Upper	posterior	premolars	others
309	42	Women	4	Upper	posterior	premolars	others
310	40	Women	2	Upper	posterior	premolars	others
311	52	Men	2	Upper	posterior	premolars	others
312	55	Women	2	Upper	posterior	premolars	prosthetic reason
313	47	Women	4	Upper	posterior	premolars	others
314	56	Men	16	Upper	posterior	premolars	others
315	42	Men	3	Upper	posterior	premolars	others
316	52	Men	4	Upper	posterior	premolars	others
317	74	Men	6	Upper	posterior	premolars	others
318	49	Men	6	Upper	posterior	premolars	prosthetic reason
319	41	Women	8	Upper	posterior	premolars	others
320	59	Women	8	Upper	posterior	premolars	others
321	18	Women	1	Upper	posterior	molars	others
322	23	Women	1	Upper	posterior	molars	others
323	29	Women	1	Upper	posterior	molars	others
324	36	Women	1	Upper	posterior	molars	others
325	37	Women	1	Upper	posterior	molars	others
326	39	Men	1	Upper	posterior	molars	others
327	47	Women	1	Upper	posterior	molars	others
328	53	Men	1	Upper	posterior	molars	others
329	42	Women	1	Upper	posterior	molars	others
330	43	Men	1	Upper	posterior	molars	prosthetic reason
331	30	Men	2	Upper	posterior	molars	others
332	33	Women	2	Upper	posterior	molars	others
333	47	Women	2	Upper	posterior	molars	others
334	49	Women	2	Upper	posterior	molars	others
335	52	Women	2	Upper	posterior	molars	others
336	42	Men	3	Upper	posterior	molars	others
337	56	Men	16	Upper	posterior	molars	others
338	23	Women	2	Upper	posterior	molars	others
339	22	Men	2	Upper	posterior	molars	others
340	23	Men	2	Upper	posterior	molars	others
341	44	Men	2	Upper	posterior	molars	others
342	66	Women	2	Upper	posterior	molars	others
343	65	Women	2	Upper	posterior	molars	others
344	64	Men	3	Upper	posterior	molars	others
345	42	Women	4	Upper	posterior	molars	others
346	60	Women	4	Upper	posterior	molars	others
347	57	Women	9	Upper	posterior	molars	others
348	49	Men	3	Upper	posterior	molars	others
349	49	Men	4	Upper	posterior	molars	others
350	55	Women	4	Upper	posterior	molars	others
351	42	Women	4	Upper	posterior	molars	others
352	49	Men	6	Upper	posterior	molars	others
353	34	Women	1	Upper	posterior	molars	others
354	43	Men	1	Upper	posterior	molars	others
355	52	Women	1	Upper	posterior	molars	others
356	49	Women	2	Upper	posterior	molars	others
357	47	Women	2	Upper	posterior	molars	others
358	49	Women	2	Upper	posterior	molars	others
359	52	Women	2	Upper	posterior	molars	others
360	45	Women	2	Upper	posterior	molars	prosthetic reason
361	56	Women	3	Upper	posterior	molars	others
362	44	Women	4	Upper	posterior	molars	others
363	42	Women	4	Upper	posterior	molars	others
364	52	Men	4	Upper	posterior	molars	others
365	49	Men	4	Upper	posterior	molars	others
366	46	Women	5	Upper	posterior	molars	prosthetic reason
367	57	Women	9	Upper	posterior	molars	others
368	23	Women	1	Upper	posterior	molars	others
369	33	Women	1	Upper	posterior	molars	others
370	35	Women	1	Upper	posterior	molars	others
371	36	Women	1	Upper	posterior	molars	others
372	43	Men	1	Upper	posterior	molars	others
373	30	Women	1	Upper	posterior	molars	others
374	19	Women	1	Upper	posterior	molars	others
375	21	Men	1	Upper	posterior	molars	others
376	20	Women	1	Upper	posterior	molars	prosthetic reason
377	26	Women	1	Upper	posterior	molars	prosthetic reason
378	40	Women	1	Upper	posterior	molars	prosthetic reason
379	42	Women	1	Upper	posterior	molars	prosthetic reason
380	42	Women	1	Upper	posterior	molars	prosthetic reason
381	43	Women	1	Upper	posterior	molars	prosthetic reason
382	45	Men	1	Upper	posterior	molars	prosthetic reason
383	47	Women	1	Upper	posterior	molars	prosthetic reason
384	52	Men	1	Upper	posterior	molars	prosthetic reason
385	52	Women	1	Upper	posterior	molars	prosthetic reason
386	67	Women	1	Upper	posterior	molars	prosthetic reason
387	20	Women	1	Upper	posterior	molars	others
388	44	Women	2	Upper	posterior	molars	prosthetic reason
389	20	Women	2	Upper	posterior	molars	others
390	29	Women	2	Upper	posterior	molars	others
391	21	Women	2	Upper	posterior	molars	others
392	25	Women	2	Upper	posterior	molars	prosthetic reason
393	36	Women	2	Upper	posterior	molars	prosthetic reason
394	56	Women	3	Upper	posterior	molars	others
395	34	Men	3	Upper	posterior	molars	others
396	39	Women	2	Upper	posterior	molars	others
397	19	Men	2	Upper	posterior	molars	others
398	22	Men	2	Upper	posterior	molars	others
399	26	Men	2	Upper	posterior	molars	others
400	20	Women	2	Upper	posterior	molars	prosthetic reason
401	32	Men	2	Upper	posterior	molars	prosthetic reason
402	45	Women	2	Upper	posterior	molars	prosthetic reason
403	60	Women	2	Upper	posterior	molars	prosthetic reason
404	41	Women	2	Upper	posterior	molars	prosthetic reason
405	21	Women	2	Upper	posterior	molars	others
406	50	Women	3	Upper	posterior	molars	prosthetic reason
407	59	Women	3	Upper	posterior	molars	prosthetic reason
408	34	Women	3	Upper	posterior	molars	others
409	44	Men	4	Upper	posterior	molars	others
410	53	Men	5	Upper	posterior	molars	others
411	48	Women	5	Upper	posterior	molars	others
412	44	Women	4	Upper	posterior	molars	others
413	44	Women	4	Upper	posterior	molars	prosthetic reason
414	52	Men	6	Upper	posterior	molars	others
415	49	Women	7	Upper	posterior	molars	others
416	42	Women	9	Upper	posterior	molars	others
417	41	Women	8	Upper	posterior	molars	others
418	37	Men	9	Upper	posterior	molars	prosthetic reason
419	30	Women	1	Lower	anterior	incisors	others
420	62	Women	1	Lower	anterior	incisors	others
421	36	Men	1	Lower	anterior	incisors	others
422	44	Women	1	Lower	anterior	incisors	others
423	85	Men	1	Lower	anterior	incisors	others
424	43	Men	3	Lower	anterior	incisors	others
425	57	Women	3	Lower	anterior	incisors	others
426	53	Men	3	Lower	anterior	incisors	others
427	43	Women	3	Lower	anterior	incisors	others
428	52	Men	3	Lower	anterior	incisors	others
429	58	Women	4	Lower	anterior	incisors	prosthetic reason
430	59	Women	4	Lower	anterior	incisors	others
431	56	Women	4	Lower	anterior	incisors	others
432	68	Women	4	Lower	anterior	incisors	prosthetic reason
433	33	Men	7	Lower	anterior	incisors	others
434	62	Men	4	Lower	anterior	incisors	others
435	65	Men	14	Lower	anterior	incisors	others
436	48	Women	5	Lower	anterior	incisors	others
437	53	Women	7	Lower	anterior	incisors	others
438	49	Women	8	Lower	anterior	incisors	others
439	63	Women	14	Lower	anterior	incisors	others
440	65	Women	9	Lower	anterior	incisors	others
441	54	Women	2	Lower	anterior	incisors	others
442	54	Women	2	Lower	anterior	incisors	others
443	51	Women	3	Lower	anterior	incisors	others
444	62	Men	4	Lower	anterior	incisors	others
445	52	Women	2	Lower	anterior	incisors	others
446	53	Men	3	Lower	anterior	incisors	prosthetic reason
447	52	Men	3	Lower	anterior	incisors	others
448	54	Women	4	Lower	anterior	incisors	prosthetic reason
449	68	Women	4	Lower	anterior	incisors	prosthetic reason
450	33	Men	7	Lower	anterior	incisors	others
451	70	Women	10	Lower	anterior	incisors	others
452	60	Women	4	Lower	anterior	incisors	others
453	56	Women	4	Lower	anterior	incisors	others
454	65	Men	14	Lower	anterior	incisors	others
455	48	Women	5	Lower	anterior	incisors	others
456	53	Women	7	Lower	anterior	incisors	others
457	72	Women	9	Lower	anterior	incisors	prosthetic reason
458	50	Women	9	Lower	anterior	incisors	others
459	57	Women	9	Lower	anterior	incisors	others
460	63	Women	14	Lower	anterior	incisors	others
461	75	Men	8	Lower	anterior	incisors	others
462	41	Women	1	Lower	anterior	canines	others
463	80	Women	4	Lower	anterior	canines	others
464	54	Women	4	Lower	anterior	canines	prosthetic reason
465	70	Women	10	Lower	anterior	canines	others
466	58	Women	4	Lower	anterior	canines	others
467	65	Men	14	Lower	anterior	canines	others
468	49	Women	8	Lower	anterior	canines	others
469	65	Women	9	Lower	anterior	canines	others
470	53	Women	7	Lower	anterior	canines	others
471	72	Women	9	Lower	anterior	canines	prosthetic reason
472	63	Women	14	Lower	anterior	canines	others
473	50	Women	9	Lower	anterior	canines	others
474	66	Men	1	Lower	posterior	premolars	prosthetic reason
475	52	Women	1	Lower	posterior	premolars	others
476	58	Men	2	Lower	posterior	premolars	others
477	56	Women	2	Lower	posterior	premolars	others
478	32	Women	3	Lower	posterior	premolars	others
479	72	Women	9	Lower	posterior	premolars	others
480	70	Men	2	Lower	posterior	premolars	others
481	55	Women	2	Lower	posterior	premolars	others
482	51	Women	3	Lower	posterior	premolars	others
483	53	Women	3	Lower	posterior	premolars	others
484	40	Women	5	Lower	posterior	premolars	others
485	53	Women	7	Lower	posterior	premolars	others
486	60	Women	4	Lower	posterior	premolars	others
487	80	Women	4	Lower	posterior	premolars	others
488	75	Men	8	Lower	posterior	premolars	others
489	70	Women	10	Lower	posterior	premolars	others
490	49	Women	8	Lower	posterior	premolars	others
491	63	Women	14	Lower	posterior	premolars	others
492	50	Women	9	Lower	posterior	premolars	others
493	18	Women	2	Lower	posterior	premolars	others
494	56	Women	2	Lower	posterior	premolars	prosthetic reason
495	43	Women	2	Lower	posterior	premolars	prosthetic reason
496	53	Women	7	Lower	posterior	premolars	others
497	44	Women	4	Lower	posterior	premolars	others
498	65	Women	9	Lower	posterior	premolars	others
499	65	Men	14	Lower	posterior	premolars	others
500	56	Men	16	Lower	posterior	premolars	others
501	26	Women	1	Lower	posterior	molars	others
502	27	Women	1	Lower	posterior	molars	others
503	28	Women	1	Lower	posterior	molars	others
504	34	Women	1	Lower	posterior	molars	others
505	38	Men	1	Lower	posterior	molars	others
506	44	Men	1	Lower	posterior	molars	others
507	50	Men	1	Lower	posterior	molars	others
508	45	Men	1	Lower	posterior	molars	prosthetic reason
509	42	Women	2	Lower	posterior	molars	others
510	46	Women	2	Lower	posterior	molars	others
511	43	Women	2	Lower	posterior	molars	others
512	35	Women	2	Lower	posterior	molars	prosthetic reason
513	55	Women	3	Lower	posterior	molars	others
514	28	Men	4	Lower	posterior	molars	others
515	59	Women	2	Lower	posterior	molars	others
516	24	Women	2	Lower	posterior	molars	others
517	68	Men	2	Lower	posterior	molars	others
518	42	Men	3	Lower	posterior	molars	others
519	43	Women	5	Lower	posterior	molars	prosthetic reason
520	70	Women	10	Lower	posterior	molars	others
521	41	Women	8	Lower	posterior	molars	others
522	63	Women	14	Lower	posterior	molars	others
523	22	Women	1	Lower	posterior	molars	others
524	30	Women	1	Lower	posterior	molars	others
525	38	Men	1	Lower	posterior	molars	others
526	40	Women	1	Lower	posterior	molars	others
527	67	Women	1	Lower	posterior	molars	others
528	41	Women	1	Lower	posterior	molars	others
529	42	Women	1	Lower	posterior	molars	others
530	48	Women	1	Lower	posterior	molars	prosthetic reason
531	39	Women	2	Lower	posterior	molars	others
532	35	Women	2	Lower	posterior	molars	others
533	60	Women	2	Lower	posterior	molars	others
534	37	Women	2	Lower	posterior	molars	others
535	67	Men	2	Lower	posterior	molars	others
536	37	Women	2	Lower	posterior	molars	prosthetic reason
537	68	Men	2	Lower	posterior	molars	others
538	53	Women	7	Lower	posterior	molars	others
539	46	Women	2	Lower	posterior	molars	others
540	35	Women	2	Lower	posterior	molars	prosthetic reason
541	32	Women	3	Lower	posterior	molars	others
542	55	Women	3	Lower	posterior	molars	others
543	54	Women	4	Lower	posterior	molars	prosthetic reason
544	46	Women	5	Lower	posterior	molars	prosthetic reason
545	41	Men	4	Lower	posterior	molars	others
546	33	Men	7	Lower	posterior	molars	others
547	49	Women	7	Lower	posterior	molars	prosthetic reason
548	70	Women	10	Lower	posterior	molars	others
549	56	Men	16	Lower	posterior	molars	others
550	50	Men	1	Lower	posterior	molars	others
551	34	Women	1	Lower	posterior	molars	others
552	33	Men	1	Lower	posterior	molars	prosthetic reason
553	50	Women	1	Lower	posterior	molars	prosthetic reason
554	63	Men	1	Lower	posterior	molars	prosthetic reason
555	21	Women	1	Lower	posterior	molars	others
556	36	Women	2	Lower	posterior	molars	prosthetic reason
557	73	Men	2	Lower	posterior	molars	others
558	24	Women	2	Lower	posterior	molars	others
559	39	Women	2	Lower	posterior	molars	prosthetic reason
560	73	Men	2	Lower	posterior	molars	prosthetic reason
561	35	Women	2	Lower	posterior	molars	others
562	60	Women	2	Lower	posterior	molars	others
563	44	Women	2	Lower	posterior	molars	others
564	21	Women	2	Lower	posterior	molars	others
565	37	Women	2	Lower	posterior	molars	prosthetic reason
566	67	Men	2	Lower	posterior	molars	prosthetic reason
567	25	Women	2	Lower	posterior	molars	prosthetic reason
568	44	Men	4	Lower	posterior	molars	others
569	40	Women	5	Lower	posterior	molars	others
570	49	Women	5	Lower	posterior	molars	prosthetic reason
571	33	Men	7	Lower	posterior	molars	others
572	42	Women	9	Lower	posterior	molars	others
573	53	Men	5	Lower	posterior	molars	others
574	43	Women	5	Lower	posterior	molars	prosthetic reason
575	52	Men	6	Lower	posterior	molars	others
576	41	Women	8	Lower	posterior	molars	others
577	65	Men	14	Lower	posterior	molars	others
578	73	Men	2	Lower	anterior	incisors	others
579	57	Women	3	Lower	anterior	incisors	others
580	59	Women	4	Lower	anterior	incisors	others
581	56	Women	4	Lower	anterior	incisors	others
582	28	Men	4	Lower	anterior	incisors	others
583	49	Men	4	Lower	anterior	incisors	others
584	51	Men	5	Lower	anterior	incisors	others
585	59	Women	3	Lower	anterior	incisors	others
586	56	Women	3	Lower	anterior	incisors	others
587	68	Women	4	Lower	anterior	incisors	prosthetic reason
588	62	Men	4	Lower	anterior	incisors	others
589	54	Women	4	Lower	anterior	incisors	prosthetic reason
590	72	Women	9	Lower	anterior	incisors	prosthetic reason
591	63	Women	14	Lower	anterior	incisors	others
592	65	Men	14	Lower	anterior	incisors	others
593	59	Women	2	Lower	anterior	incisors	others
594	83	Men	2	Lower	anterior	incisors	others
595	41	Men	4	Lower	anterior	incisors	others
596	60	Women	4	Lower	anterior	incisors	others
597	49	Women	8	Lower	anterior	incisors	others
598	54	Women	2	Lower	anterior	incisors	others
599	54	Women	2	Lower	anterior	incisors	others
600	50	Women	2	Lower	anterior	incisors	others
601	65	Women	2	Lower	anterior	incisors	others
602	59	Women	8	Lower	anterior	incisors	prosthetic reason
603	57	Women	3	Lower	anterior	incisors	others
604	53	Men	3	Lower	anterior	incisors	others
605	43	Women	3	Lower	anterior	incisors	prosthetic reason
606	59	Women	4	Lower	anterior	incisors	others
607	62	Men	4	Lower	anterior	incisors	others
608	49	Men	4	Lower	anterior	incisors	others
609	56	Women	4	Lower	anterior	incisors	others
610	68	Women	4	Lower	anterior	incisors	prosthetic reason
611	48	Women	5	Lower	anterior	incisors	others
612	33	Men	7	Lower	anterior	incisors	others
613	65	Women	9	Lower	anterior	incisors	others
614	57	Women	9	Lower	anterior	incisors	others
615	70	Women	10	Lower	anterior	incisors	others
616	63	Women	14	Lower	anterior	incisors	others
617	65	Men	14	Lower	anterior	incisors	others
618	56	Men	16	Lower	anterior	incisors	others
619	56	Men	16	Lower	anterior	incisors	others
620	33	Men	1	Lower	anterior	canines	prosthetic reason
621	57	Women	1	Lower	anterior	canines	prosthetic reason
622	74	Men	2	Lower	anterior	canines	others
623	55	Women	2	Lower	anterior	canines	others
624	50	Women	2	Lower	anterior	canines	others
625	63	Men	5	Lower	anterior	canines	prosthetic reason
626	49	Men	6	Lower	anterior	canines	prosthetic reason
627	83	Men	2	Lower	anterior	canines	others
628	58	Women	4	Lower	anterior	canines	others
629	80	Women	4	Lower	anterior	canines	others
630	49	Women	8	Lower	anterior	canines	prosthetic reason
631	54	Women	4	Lower	anterior	canines	prosthetic reason
632	75	Men	8	Lower	anterior	canines	others
633	59	Women	4	Lower	anterior	canines	others
634	49	Men	4	Lower	anterior	canines	others
635	42	Women	9	Lower	anterior	canines	others
636	53	Women	7	Lower	anterior	canines	others
637	70	Women	10	Lower	anterior	canines	others
638	63	Women	14	Lower	anterior	canines	others
639	65	Men	14	Lower	anterior	canines	others
640	56	Men	16	Lower	anterior	canines	others
641	42	Women	1	Lower	posterior	premolars	others
642	53	Women	1	Lower	posterior	premolars	others
643	66	Women	1	Lower	posterior	premolars	others
644	20	Men	1	Lower	posterior	premolars	others
645	70	Men	2	Lower	posterior	premolars	others
646	51	Men	2	Lower	posterior	premolars	others
647	74	Men	2	Lower	posterior	premolars	others
648	42	Women	4	Lower	posterior	premolars	others
649	63	Men	5	Lower	posterior	premolars	prosthetic reason
650	49	Men	6	Lower	posterior	premolars	prosthetic reason
651	75	Men	8	Lower	posterior	premolars	others
652	58	Women	4	Lower	posterior	premolars	others
653	59	Women	8	Lower	posterior	premolars	others
654	57	Women	9	Lower	posterior	premolars	others
655	54	Women	4	Lower	posterior	premolars	others
656	53	Men	5	Lower	posterior	premolars	others
657	42	Women	9	Lower	posterior	premolars	others
658	65	Men	14	Lower	posterior	premolars	others
659	50	Women	9	Lower	posterior	premolars	others
660	37	Men	9	Lower	posterior	premolars	others
661	72	Women	9	Lower	posterior	premolars	prosthetic reason
662	70	Women	10	Lower	posterior	premolars	others
663	63	Women	14	Lower	posterior	premolars	others
664	32	Women	1	Lower	posterior	premolars	others
665	50	Women	1	Lower	posterior	premolars	others
666	52	Women	1	Lower	posterior	premolars	others
667	57	Women	2	Lower	posterior	premolars	prosthetic reason
668	42	Women	4	Lower	posterior	premolars	others
669	75	Men	8	Lower	posterior	premolars	others
670	31	Women	2	Lower	posterior	premolars	others
671	51	Men	2	Lower	posterior	premolars	others
672	43	Women	3	Lower	posterior	premolars	others
673	63	Men	5	Lower	posterior	premolars	prosthetic reason
674	49	Men	6	Lower	posterior	premolars	prosthetic reason
675	49	Women	8	Lower	posterior	premolars	others
676	59	Women	8	Lower	posterior	premolars	others
677	37	Men	9	Lower	posterior	premolars	others
678	72	Women	9	Lower	posterior	premolars	prosthetic reason
679	56	Men	16	Lower	posterior	premolars	others
680	65	Men	14	Lower	posterior	premolars	others
681	20	Men	1	Lower	posterior	molars	others
682	26	Men	1	Lower	posterior	molars	others
683	39	Men	1	Lower	posterior	molars	others
684	46	Women	1	Lower	posterior	molars	others
685	53	Men	1	Lower	posterior	molars	others
686	37	Men	1	Lower	posterior	molars	others
687	52	Women	2	Lower	posterior	molars	others
688	50	Women	3	Lower	posterior	molars	others
689	70	Women	10	Lower	posterior	molars	others
690	58	Men	2	Lower	posterior	molars	others
691	18	Women	2	Lower	posterior	molars	others
692	42	Women	2	Lower	posterior	molars	others
693	43	Men	2	Lower	posterior	molars	others
694	47	Women	2	Lower	posterior	molars	others
695	57	Women	2	Lower	posterior	molars	prosthetic reason
696	42	Men	3	Lower	posterior	molars	others
697	63	Men	5	Lower	posterior	molars	prosthetic reason
698	49	Men	6	Lower	posterior	molars	prosthetic reason
699	59	Women	8	Lower	posterior	molars	others
700	42	Women	9	Lower	posterior	molars	others
701	37	Men	9	Lower	posterior	molars	others
702	63	Women	14	Lower	posterior	molars	others
703	39	Women	1	Lower	posterior	molars	others
704	46	Women	1	Lower	posterior	molars	others
705	51	Women	1	Lower	posterior	molars	others
706	57	Women	1	Lower	posterior	molars	others
707	46	Men	1	Lower	posterior	molars	prosthetic reason
708	51	Women	1	Lower	posterior	molars	prosthetic reason
709	51	Women	1	Lower	posterior	molars	prosthetic reason
710	61	Women	1	Lower	posterior	molars	prosthetic reason
711	43	Men	2	Lower	posterior	molars	others
712	40	Men	2	Lower	posterior	molars	prosthetic reason
713	53	Women	2	Lower	posterior	molars	others
714	37	Women	2	Lower	posterior	molars	prosthetic reason
715	50	Women	3	Lower	posterior	molars	others
716	49	Women	5	Lower	posterior	molars	others
717	47	Women	4	Lower	posterior	molars	others
718	43	Women	5	Lower	posterior	molars	others
719	63	Men	5	Lower	posterior	molars	prosthetic reason
720	49	Women	8	Lower	posterior	molars	others
721	42	Women	9	Lower	posterior	molars	prosthetic reason
722	70	Women	10	Lower	posterior	molars	others
723	32	Men	1	Lower	posterior	molars	others
724	37	Women	1	Lower	posterior	molars	prosthetic reason
725	43	Women	1	Lower	posterior	molars	prosthetic reason
726	45	Women	1	Lower	posterior	molars	prosthetic reason
727	46	Men	1	Lower	posterior	molars	prosthetic reason
728	71	Women	1	Lower	posterior	molars	prosthetic reason
729	52	Women	1	Lower	posterior	molars	others
730	23	Women	1	Lower	posterior	molars	others
731	31	Women	2	Lower	posterior	molars	prosthetic reason
732	49	Women	2	Lower	posterior	molars	prosthetic reason
733	47	Women	2	Lower	posterior	molars	others
734	26	Men	2	Lower	posterior	molars	others
735	41	Women	2	Lower	posterior	molars	prosthetic reason
736	44	Women	4	Lower	posterior	molars	prosthetic reason
737	46	Women	5	Lower	posterior	molars	prosthetic reason
738	36	Women	2	Lower	posterior	molars	others
739	36	Women	2	Lower	posterior	molars	prosthetic reason
740	36	Women	2	Lower	posterior	molars	prosthetic reason
741	73	Men	2	Lower	posterior	molars	prosthetic reason
742	40	Men	2	Lower	posterior	molars	prosthetic reason
743	34	Men	3	Lower	posterior	molars	prosthetic reason
744	50	Women	3	Lower	posterior	molars	others
745	52	Men	3	Lower	posterior	molars	prosthetic reason
746	59	Women	3	Lower	posterior	molars	prosthetic reason
747	53	Men	5	Lower	posterior	molars	others
748	52	Men	6	Lower	posterior	molars	others
749	42	Women	9	Lower	posterior	molars	others
